# Supplementary material
Source: Research Square preprint supplement (doi:10.21203/rs.3.rs-9320717/v1)
Supplement: Supplementary file 1 [file 2ebbfc4d7e1f05757f03a15d.docx]

**Supplementary Materials**

**Supplementary 1:** Growth of Thraustochytrids on Zn4L

| Hour | **Zn4L (1)** | | |
| --- | --- | --- | --- |
| 24 Hour | 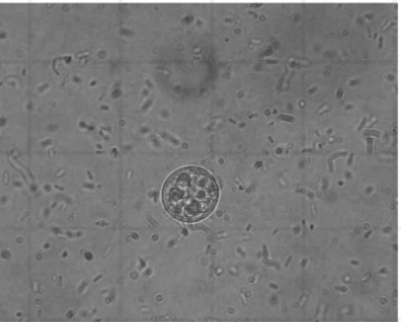 | 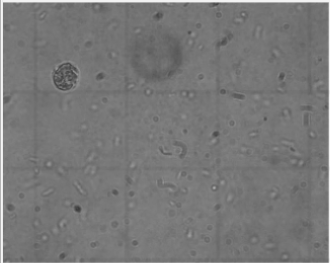 | 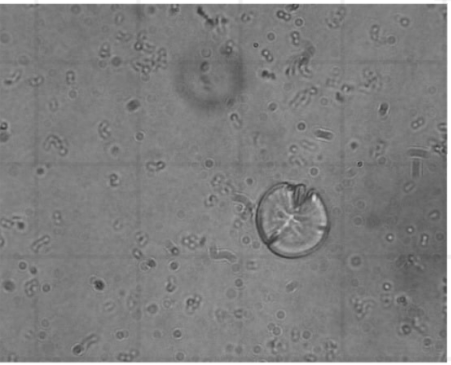 |
| 104  = 10,6 x 104 cell/ml | | |
| **Zn4L (2)** | | |
| 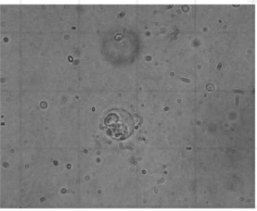 | 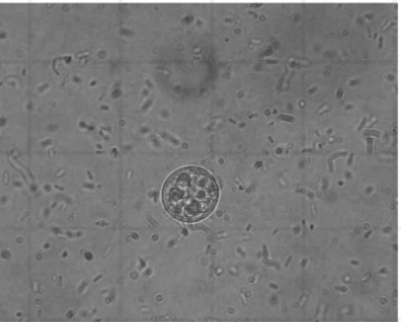 | 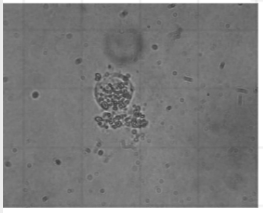 |
| 104  = 5,3 x 104 cell/ml | | |
| **Zn4L (3)** | | |
| 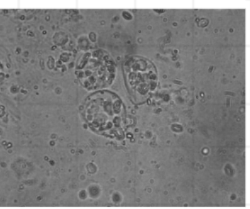 | 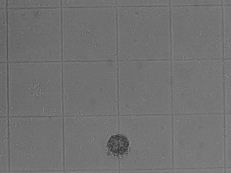 | 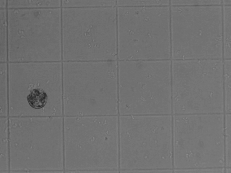 |
| 104  = 10,6 x 104 cell/ml | | |
| 48 Hour | **Zn4L (1)** | | |
| 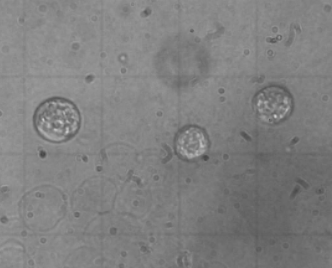 | 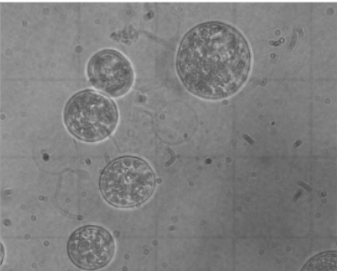 | 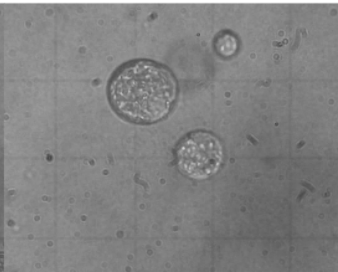 |
| 104  = 58,6 x 104 cell/ml | | |
| **Zn4L (2)** | | |
| 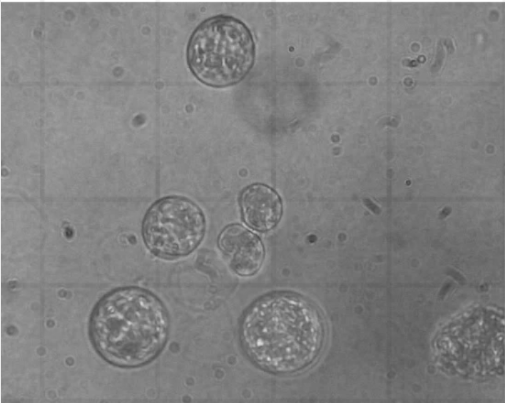 | 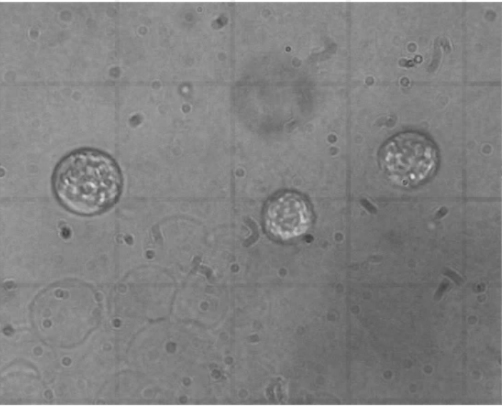 | 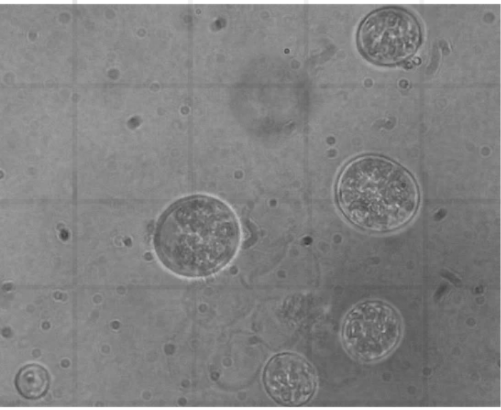 |
| 104  = 85,3 x 104 cell/ml | | |
| **Zn4L (3)** | | |
| 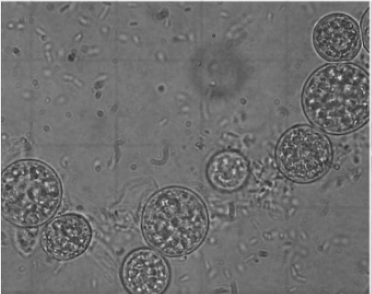 | 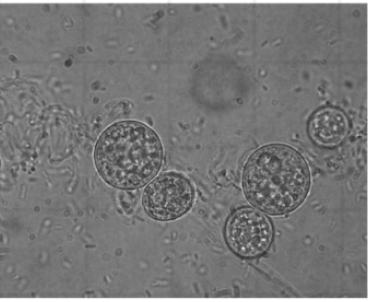 | 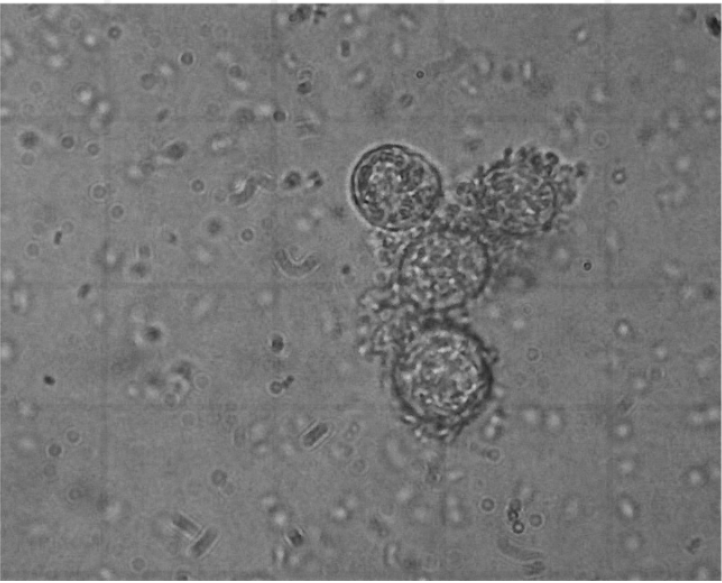 |
| 104  = 85,3 x 104 cell/ml | | |
| 72 Hour | **Zn4L (1)** | | |
| 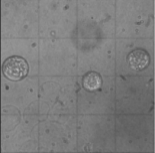 | 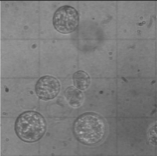 | 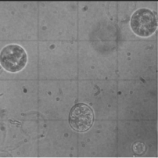 |
| 104  = 64 x 104 cell/ml | | |
| **Zn4L (2)** | | |
| 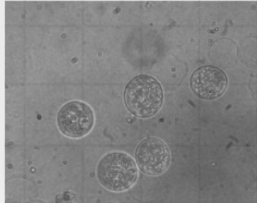 | 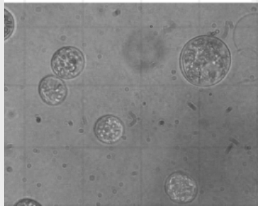 | 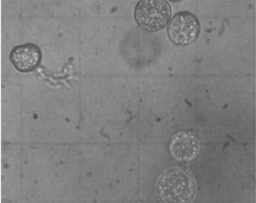 |
| 104  = 90,6 x 104 cell/ml | | |
| **Zn4L (3)** | | |
| 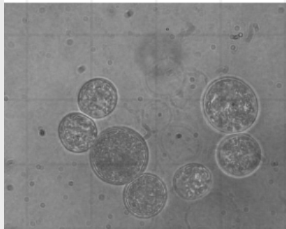 | 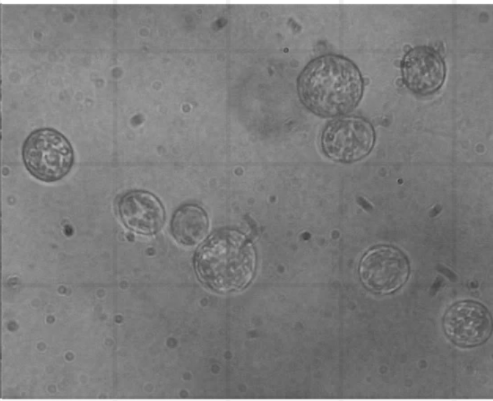 | 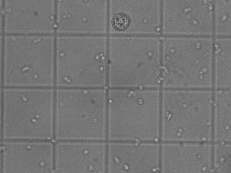 |
| 104  = 90,6 x 104 cell/ml | | |

**Table 3.** Growth of Thraustochytrids on Zn2L

| Hour | **Zn2L (1)** | | |
| --- | --- | --- | --- |
| 24 Hour | 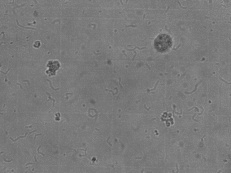 | 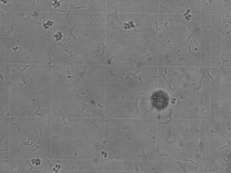 | 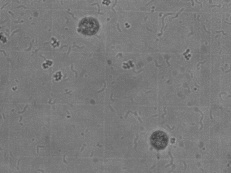 |
| 104  = 21,3 x 104 cell/ml | | |
| **Zn2L (2)** | | |
| 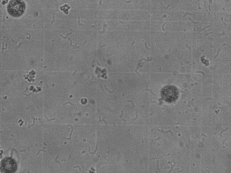 | 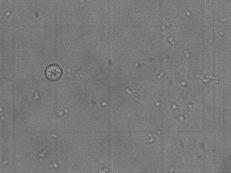 | 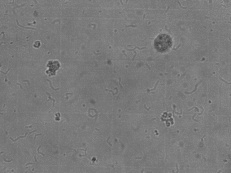 |
| 104  = 26,6 x 104 cell/ml | | |
| **Zn2L (3)** | | |
| 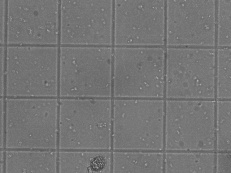 | 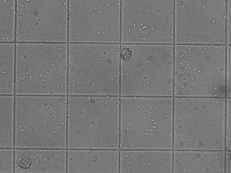 | 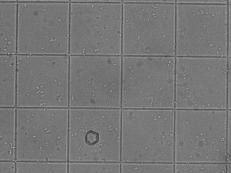 |
| 104  = 16 x 104 cell/ml | | |
| 48 Hour | **Zn2L (1)** | | |
| 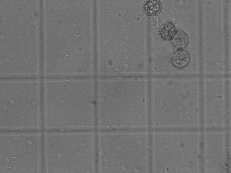 | 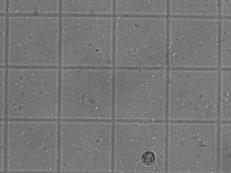 | 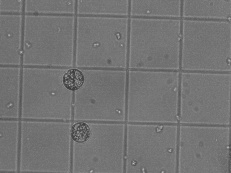 |
| 104  = 37,3 x 104 cell/ml | | |
| **Zn2L (2)** | | |
| 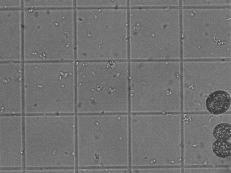 | 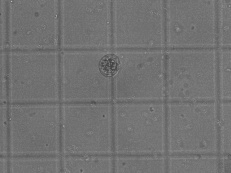 | 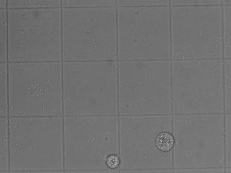 |
| 104  = 32 x 104 cell/ml | | |
| **Zn2L (3)** | | |
| 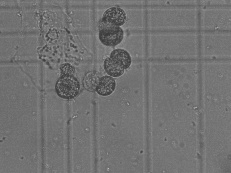 | 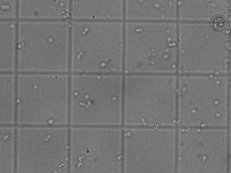 | 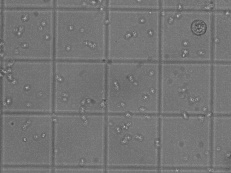 |
| 104  = 42,6 x 104 cell/ml | | |
| 72 Hour | **Zn2L (1)** | | |
| 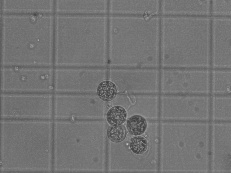 | 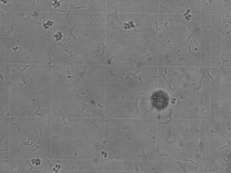 | 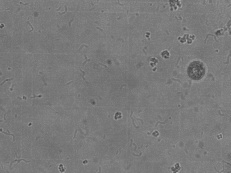 |
| 104  = 42,6 x 104 cell/ml | | |
| **Zn2L (2)** | | |
| 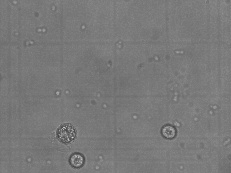 | 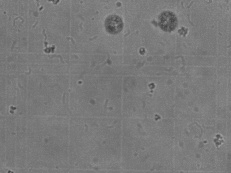 | 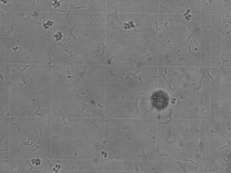 |
| 104  = 32 x 104 cell/ml | | |
| **Zn2L (3)** | | |
| 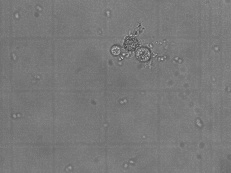 | 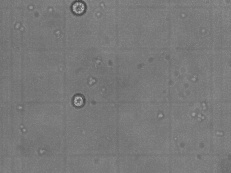 | 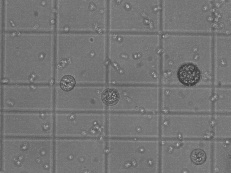 |
| 104  = 48 x 104 cell/ml | | |

**Table 4.** Growth of Thraustochytrids in Zn7L

| Hour | **Zn7L (1)** | | |
| --- | --- | --- | --- |
| 24 Hour | 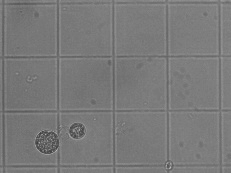 | 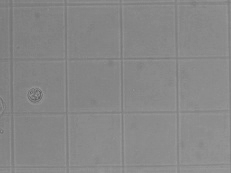 | 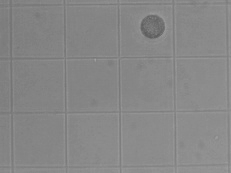 |
| 104  = 21,3 x 104 cell/ml | | |
| **Zn7L (2)** | | |
| 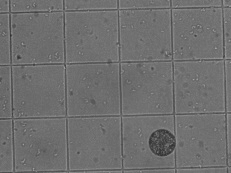 | 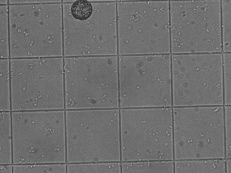 | 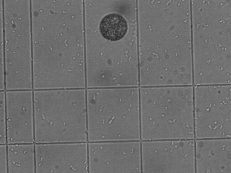 |
| 104  = 16 x 104 cell/ml | | |
| **Zn7L (3)** | | |
| 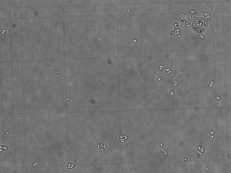 | 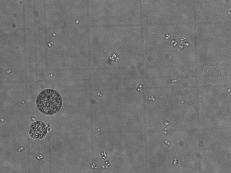 | 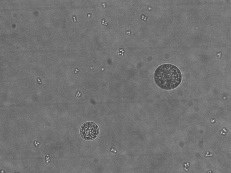 |
| 104  = 26,6 x 104 cell/ml | | |
| 48 Hour | **Zn7L (1)** | | |
| 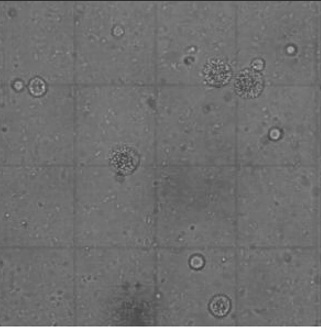 | 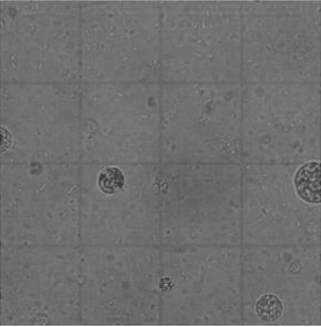 | 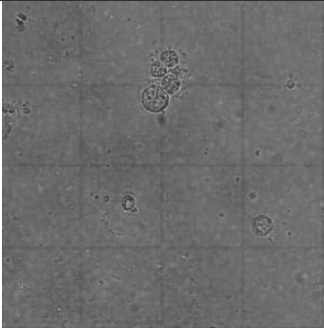 |
| 104  = 74,6 x 104 cell/ml | | |
| **Zn7L (2)** | | |
| 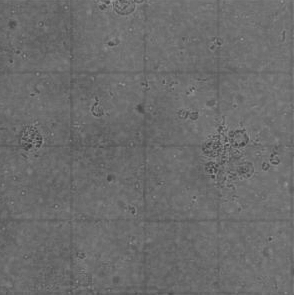 | 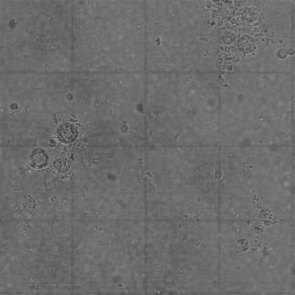 | 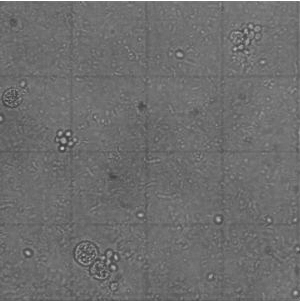 |
| 104  = 85,3 x 104 cell/ml | | |
| **Zn7L (3)** | | |
| 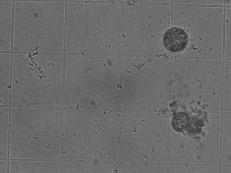 | 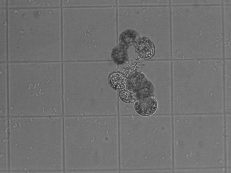 | 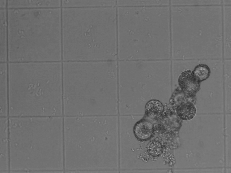 |
| 104  = 96 x 104 cell/ml | | |
| 72 Hour | **Zn7L (1)** | | |
| 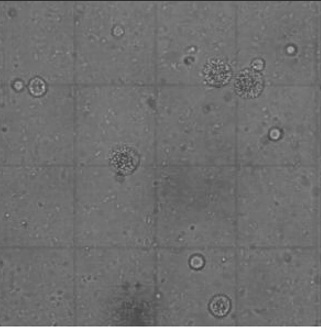 | 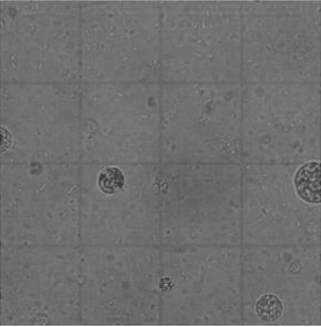 | 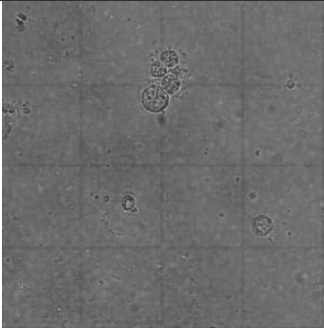 |
| 104  = 74,6 x 104 cell/ml | | |
| **Zn7L (2)** | | |
| 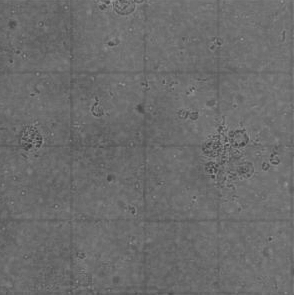 | 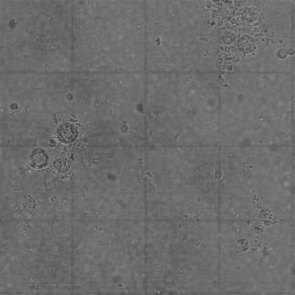 | 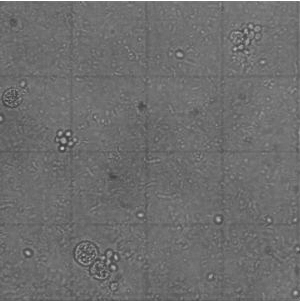 |
| 104  = 85,3 x 104 cell/ml | | |
| **Zn7L (3)** | | |
| 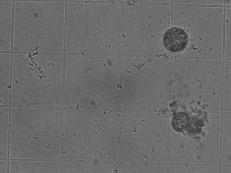 | 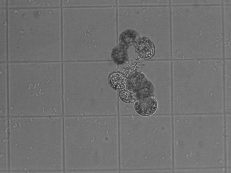 | 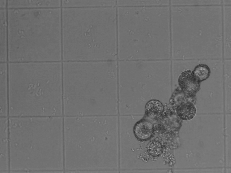 |
| 104  = 96 x 104 cell/ml | | |

**Table 5.** Growth of Thraustochytrids in Zn7B

| Hour | **Zn7B (1)** | | |
| --- | --- | --- | --- |
| 24 Hour | 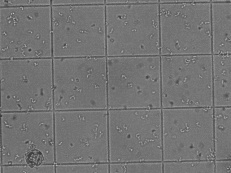 | 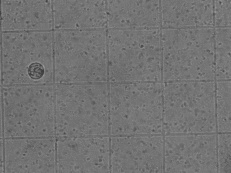 | 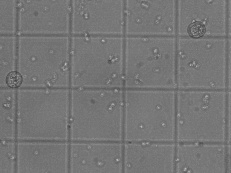 |
| 104  = 21,3 x 104 cell/ml | | |
| **Zn7B (2)** | | |
| 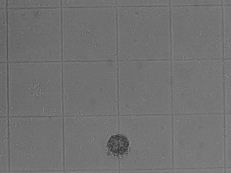 | 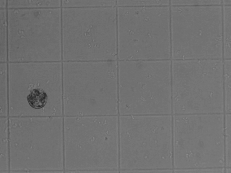 | 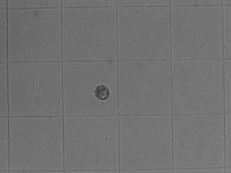 |
| 104  = 16 x 104 cell/ml | | |
| **Zn7B (3)** | | |
| 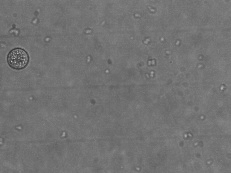 | 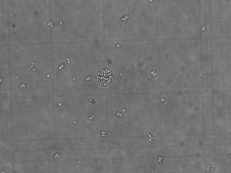 | 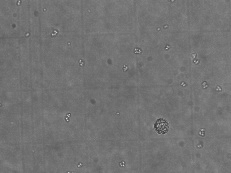 |
| 104  = 16 x 104 cell/ml | | |
| 48 Hour | **Zn7B (1)** | | |
| 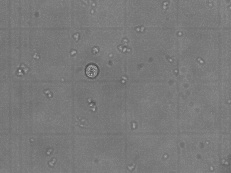 | 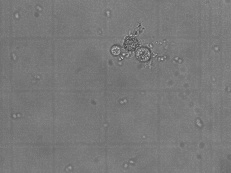 | 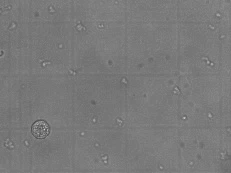 |
| 104  = 26,6 x 104 cell/ml | | |
| **Zn7B (2)** | | |
| 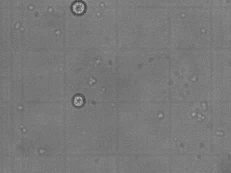 | 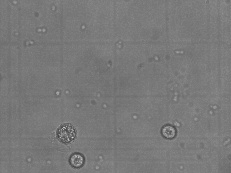 | 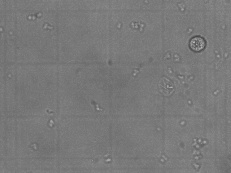 |
| 104  = 32 x 104 cell/ml | | |
| **Zn7B (3)** | | |
| 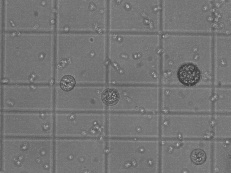 | 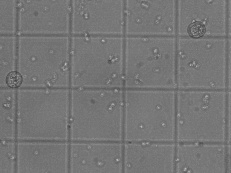 | 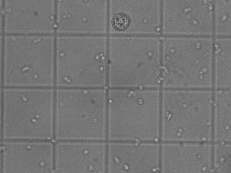 |
| 104  = 37,3 x 104 cell/ml | | |
| 72 Hour | **Zn7B (1)** | | |
| 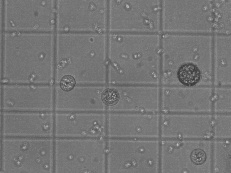 |  |  |
| 104  = 37,3 x 104 cell/ml | | |
| **Zn7B (2)** | | |
|  |  |  |
| 104  = 42,6 x 104 cell/ml | | |
| **Zn7B (3)** | | |
|  |  |  |
| 104  = 42,6 x 104 cell/ml | | |

**Table 6** Growth of Thraustochytrids on Zn1L

| Hour | **Zn1L (1)** | | |
| --- | --- | --- | --- |
| 24 Hour |  |  |  |
| 104  = 16 x 104 cell/ml | | |
| **Zn1L (2)** | | |
|  |  |  |
| 104  = 21,3 x 104 cell/ml | | |
| **Zn1L (3)** | | |
|  |  |  |
| 104  = 16 x 104 cell/ml | | |
| 48 Hour | **Zn1L (1)** | | |
|  |  |  |
| 104  = 26,6 x 104 cell/ml | | |
| **Zn1L (2)** | | |
|  |  |  |
| 104  = 21,3 x 104 cell/ml | | |
| **Zn1L (3)** | | |
|  |  |  |
| 104  = 32 x 104 cell/ml | | |
| 72 Hour | **Zn1L (1)** | | |
|  |  |  |
| 104  = 37,3 x 104 cell/ml | | |
| **Zn1L (2)** | | |
|  |  |  |
| 104  = 26,6 x 104 cell/ml | | |
| **Zn1L (3)** | | |
|  |  |  |
| 104  = 37,3 x 104 cell/ml | | |

**Table 7.** Growth of Thraustochytrids on Zn1B

| Hour | **Zn1B (1)** | | |
| --- | --- | --- | --- |
| 24 Hour |  |  |  |
| 104  = 10,6 x 104 cell/ml | | |
| **Zn1B (2)** | | |
|  |  |  |
| 104  = 5,3 x 104 cell/ml | | |
| **Zn1B (3)** | | |
|  |  |  |
| 104  = 10,6 x 104 cell/ml | | |
| 48 Hour | **Zn1B (1)** | | |
|  |  |  |
| 104  = 58,6 x 104 cell/ml | | |
| **Zn1B (2)** | | |
|  |  |  |
| 104  = 85,3 x 104 cell/ml | | |
| **Zn1B (3)** | | |
|  |  |  |
| 104  = 85,3 x 104 cell/ml | | |
| 72 Hour | **Zn1B (1)** | | |
|  |  |  |
| 104  = 64 x 104 cell/ml | | |
| **Zn1B (2)** | | |
|  |  |  |
| 104  = 64 x 104 cell/ml | | |
| **Zn1B (3)** | | |
|  |  |  |
| 104  = 90,6 x 104 cell/ml | | |

**Supplementary 2**: Specific growth rates quantifications for marine protist isolates.

h-1

h-1

h-1

h-1

h-1

h-1

**Supplementary 3**: 18sRNA sequences of isolates from Java Island (SR4-950R_B and Euka-550R_B) and Madura Island (SR4-950_M and Euka-550_M)

**>SR4-950R_B**

GTGCCAGCAGCCGCGGTAATTCAGCTCCAGAAGCATATGCTAAAGTTGTTGCAGTTAAAAAGCTTGTAGTTGAATTTCTGGCATGGGCGACCGGTGCTTTCCCTGAATGGGGATTGATTGTCTGTGTTGCCTTGGCCATCTTTTTCTTTTCTTTTTTGGGGAGAAATCTTTCACTGTAATCAAAGCAGAGTGTTCCAAGCAGGTCGTATGACCGGTATGTTTATTATGGGATGATAAGATAGGACTTGGGTGCTATTTTGTTGGTTTGCACGCCTGAGTAATGGTTAATAGGAACAGTTGGGGGTATTCGTATTTAGGAGCTAGAGGTGAAATTCTTGGATTTTCCGAAAGACGAACTAGAGCGAAGGCAT

**>SR4-950_M**
TCGCCAGTAGCCATTTGCTTGTTTCAAAGATTAAGGCATGCATGTCTGAGTCTATCCCTTTACACGGTTAAGCTGCGAATGGCTCATTATAACAGTAATGATCTATTTGATGATTATCGTTACATGGATAACTACAGTAATTCTGGAGCCAATACATGTTTCAACACCCAACTTATTGGAGGGTGGTGCTTACCAAATTCAGAACCAATCCAAGCTTGCTTGGTATCATAATGAAGTATGGTAAGAGGATGAATCACATGGTCTTTCTGGTGATGCATCTCATGAGTTTCTGACCTATCAGCTTTGGATGGTAGGGTATTGGCCTACCATGGCAATGACGGGTAACGGAGAATTAGGGTTTGATTCCGGAGAGGGAGCCTGAGAAATGGCTACCACATCTAAGGAAGGCAGCAGGCGCGCAAATTACCCAATCTTGACACAAGGAGGTAGTGACAAGAAATAACAATACAGGGCATCCATGTTTTGTAATTGGAATGAGCAGAATTTAAAACACTTTGCAAGTATCAATTGGAGGGCAAGTTTGGTGCCAGCAGCCGCGGTAATTCCAGCTCCAATAGCGTATATTAAAGTTGTTGCAGTTAAAAAGCTCGTAGTTGAATTTCTGCATAGGGCTGTTGGTCCATCCCCTGGGTGAGTATCTGACATGTTCTGTGCATGAGTCTTGATGACTATAGGGCCTTCGCTGGTCGTATAGTTGTCAGCTATTTTACTTTGAGGAAATTAGAGTGTTTCAAGCAGGCATGTGCCTTGAATATATTAGCATGGAATAATGAAATTGAGCTTTGGATCTTTTTTATTGGTTTCGAGAACCATCGCAACGATTGATAGGGACAATTGGGGGCATTTGTATTTAACTGTCAGAGGTGAAATTCTTGGATTTGTTAAAGACACACTAATGCGAAAGCAT

**>Euka-550R_B**
ATCCTGCCAGTAGTCATATGCTCGTCTCAAAGATTAAGCCATGCATGTGTAAGTATAAGCGATTGTACTGTGAGACTGCGAACGGCTCATTATATCAGTAATAATTTTTTCGGTAGTTTCTTTTATATGGATACCTGCAGTAATTCTGGAAATAATACATGCTGTAAGAGCCCTGTATGGGGCTGCACTTATTAGATTGAAGCCGATTTTATTGGTGAATCATGATAATTGAGCAGATTGACTTTTTTGGTCGATGAATCGTTTGAGTTTCTGCCCCATCAGTTGTCGACGGTAGTGTATTGGACTACGGTGACTATAACGGGTGACGGAGAGTTAGGGCTCGACTCCGGAGAGGGAGCCTGAGAGACGGCTACCATATCCAAGGATAGCAGCAGGCGCGTAAATTACCCACTGTGGACTCCACGAGGTAGTGACGAGAAATATCGATGCGAAGCGTGTATGCGTTTTGCTATCGGAATGAGAGCAATGTAAAACCCTCATCGAGGATCAACTG

**>Euka-550_M**
AAAGATTAAGCCATGCATGTCTGAGTCTATGCCTTTACACGGTTAAGCTGCGAATGGCTCATTATAACAGTAATGATCTATTTGATGATTATCGTTACATGGATAACTACAGTAATTCTGGAGCCAATACATGTTTCAACACCCAACTTATTGGAGGGTGGTGCTTACCAAATTCAGAACCAATCCAAGCTTGCTTGGTATCATAATGAAGTATGGTAAGAGGATGAATCACATGGTCTTTCTGGTGATGCATCTCATGAGTTTCTGACCTATCAGCTTTGGATGGTAGGGTATTGGCCTACCATGGCAATGACGGGTAACGGAGAATTAGGGTTCGATTCCGGAGAGGGAGCCTGAGAAATGGCTACCACATCTAAGGAAGGCAGCAGGCGCGCAAATTACCCAATCTTGACACAAGGAGGTAGTGACAAGAAATAACAATACAGGGCATCCATGTCTTGTAATTGGAATGAGCAGAATTTAAAACACTTTGCAAGTTTCAATTGGAGGGCAAGTCTGGTGCCAGCAGCCGCGGTAATTCCAGCTCCAATAGCGTATATTAAAGTTGTTGCAGTTAAAAAGCTCGTAGTTGAATTTCTGCATAGGGCTGTTGGTCCATCCCCTGCGTGAGTATCTGACATGTTCTGTGCTTGAGACATGATGACTATA
